# Supplementary material
Source: HighWire-hosted journal article supplement (https://diabetes.diabetesjournals.org/content/suppl/2005/12/28/55.1.93)
Supplement: WerstuckOnlineAppendixPg93.pdf [file WerstuckOnlineAppendixPg93.pdf]

## **Appendix**

### **Supplementary Figure I. Glucose and glucosamine induce an ER stress response.**

Quantification of the Northern blots and immunoblots from Figure 1. The data represent average band intensities after normalization to loading controls  $\pm$  SD of three experiments. \*,  $P < 0.05$  relative to untreated controls.

### **Supplementary Figure II. Glucose and glucosamine induce an ER stress response in cell types relevant to the development of atherosclerosis. A) Immunoblot analysis of**

HepG2, HASMC and Thp-1 cells cultured in the presence of glucose, glucosamine or mannitol, as indicated, for 8 hours. Total protein lysates (40  $\mu$ g/lane) were separated by SDS-PAGE, transferred to nitrocellulose membranes and immunostained with antibodies against proteins that are induced by ER stress including GRP78/BiP and the transcription factor, GADD153/CHOP. As a loading control the blots were immunostained with an antibody against  $\beta$  actin. B) Quantification of the immunoblots in from panel A. The data represent average band intensities after normalization to loading controls  $\pm$  SD of three experiments. \*,  $P < 0.05$  relative to untreated controls.

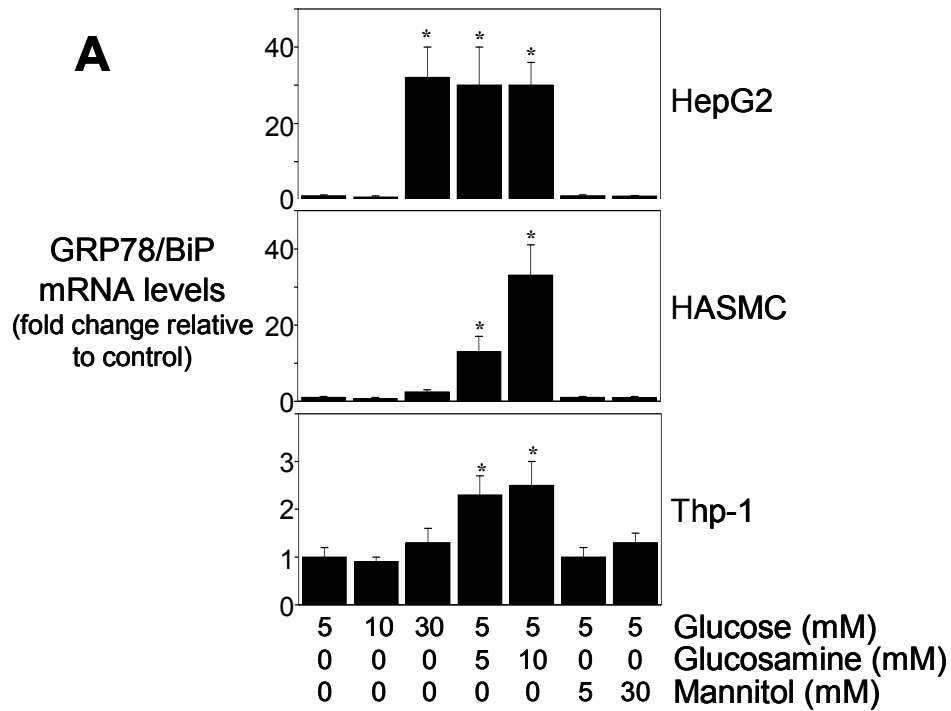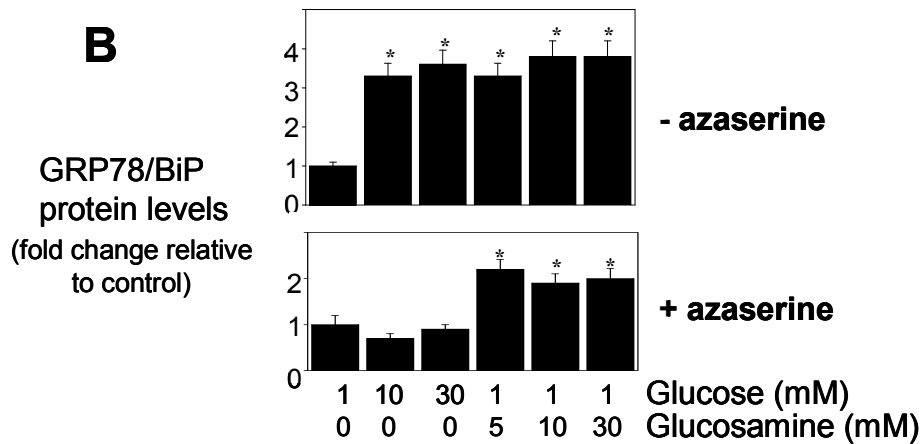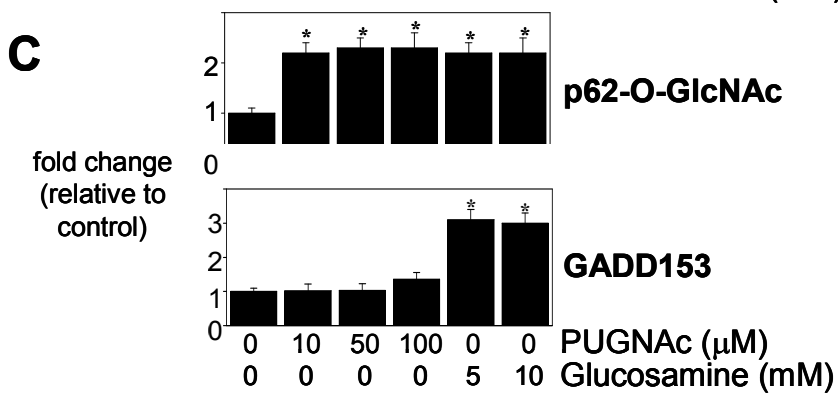

**Supplementary Figure I**

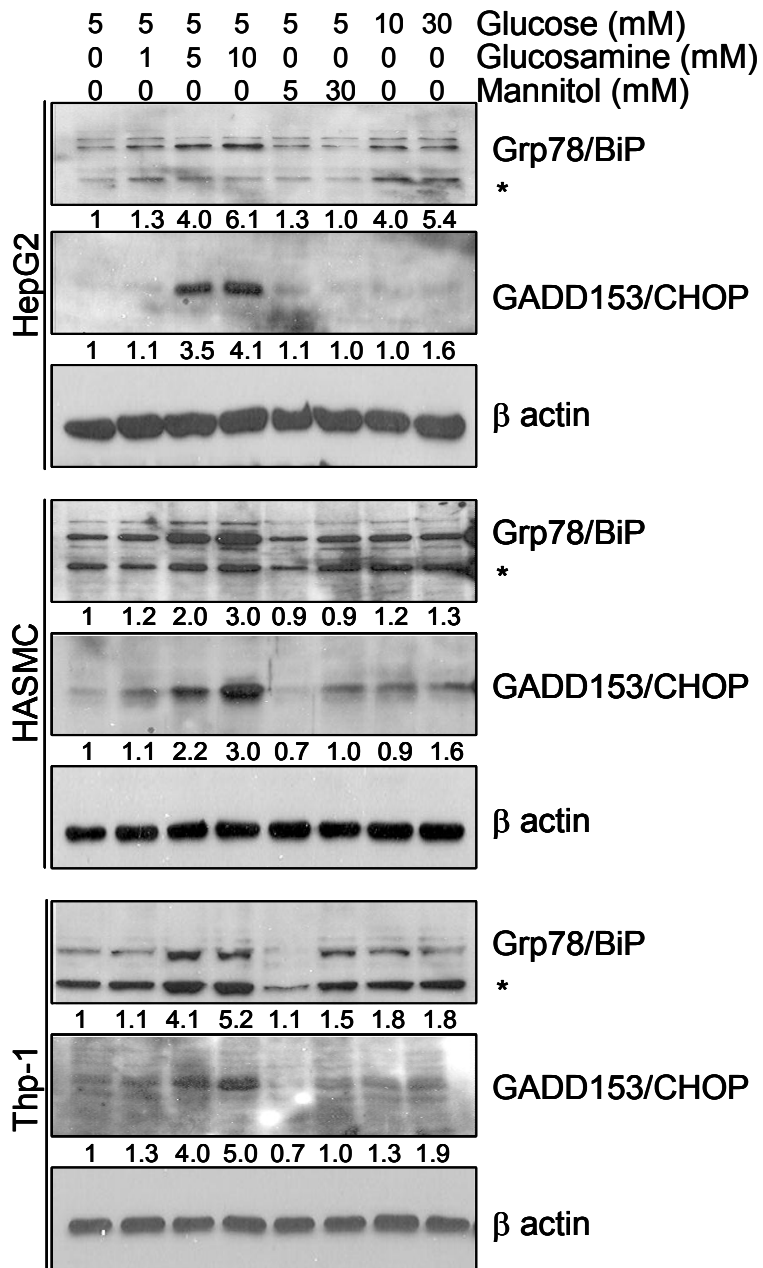

Supplementary Figure IIA

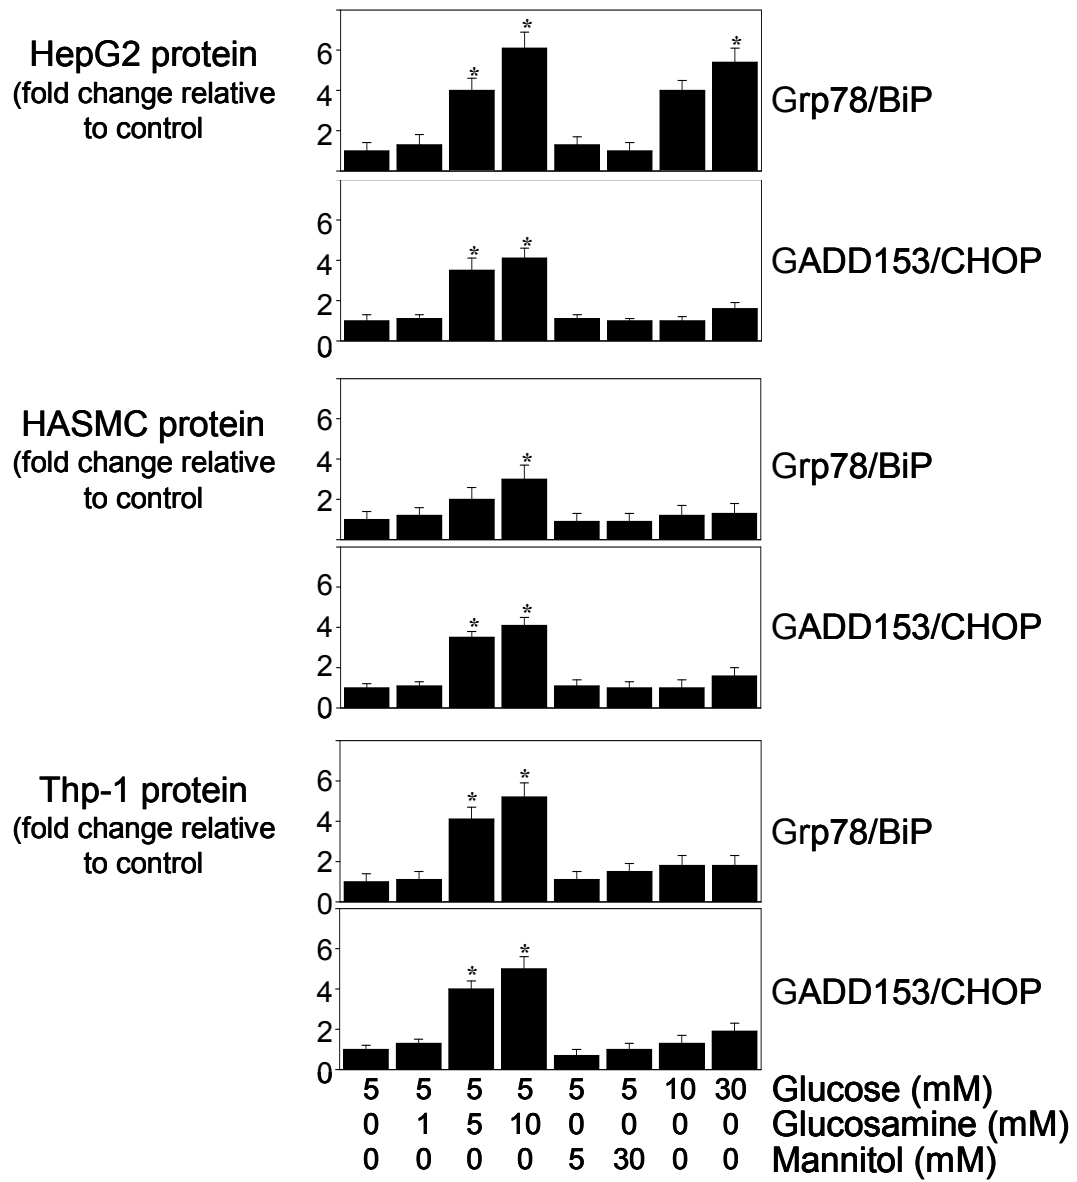

**Supplementary Figure IIB**
